# Supplementary material for: Three-dimensional phase evolution and stress-induced non-uniform Li intercalation behavior in lithium iron phosphate
Source: Royal Society of Chemistry journal article supplement (doi:10.1039/c9ta11697d), 2019-12-19
Supplement: c9ta11697d2.pdf [file c9ta11697d2.pdf]

Supplementary Information for  
**Three-Dimensional Phase Evolution and Stress-Induced Non-Uniform Li Intercalation  
Behavior in Lithium Iron Phosphate**

Kaiqi Yang<sup>1</sup> and Ming Tang<sup>1, \*</sup>

1. Department of Materials Science & NanoEngineering, Rice University, Houston, TX 77005,  
USA.

\* Corresponding author email: [mingtang@rice.edu](mailto:mingtang@rice.edu)

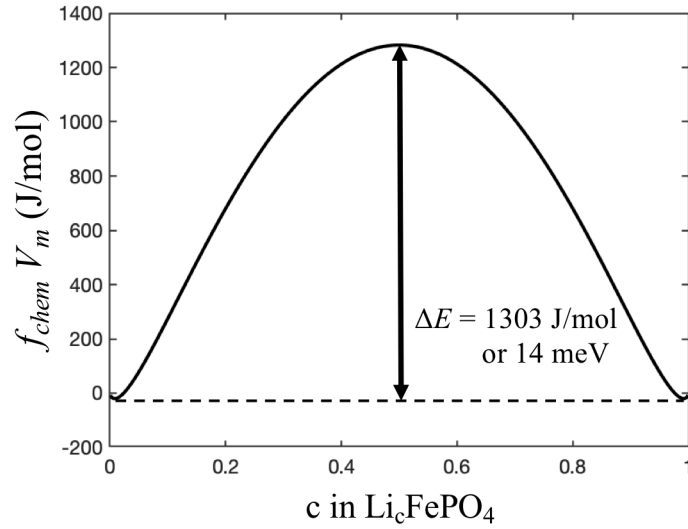

**Supplementary Figure S1.** Molar chemical free energy density of  $Li_cFePO_4$  as given by Eq. 2 in the main text.

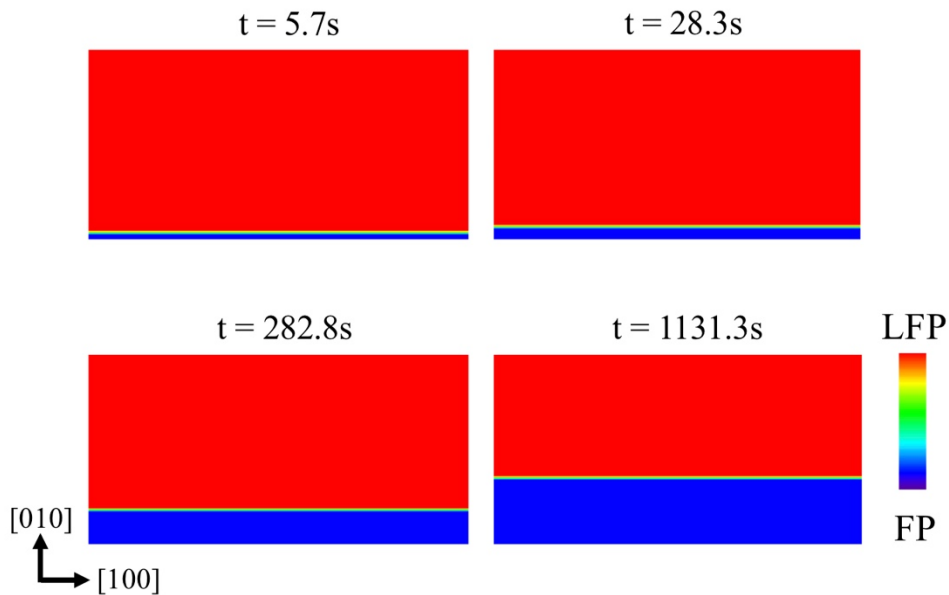

**Supplementary Figure S2.** Phase-field simulation of FP phase growth under 100 mV overpotential in the absence of coherency stress by assuming zero misfit strain between LFP and FP phases. Simulation domain size is  $L_{[100]} \times L_{[001]} \times L_{[010]} = 256 \times 128 \times 256 \text{ nm}$ . The (001) cross section of Li concentration distribution is shown.

**Supplementary Movie 1.** Phase-field simulation of FP phase growth in a  $\text{LiFePO}_4$  single crystal upon delithiation at a constant overpotential  $\Delta\phi = 100$  mV. Li is removed from the bottom surface of the computation domain. The animation on the top visualizes the evolution of the region with Li concentration  $c < 0.5$ . The animation at the bottom shows the (001) cross section of the Li concentration field, the position of which is indicated by the shaded plane in Figure 1a.
